# Supplementary material for: Shady business: understanding the spatial ecology of exophilic Anopheles mosquitoes
Source: PubMed Central journal article supplement (PMC6173902; doi:10.1186/s12936-018-2499-7), 2018-10-05
Supplement: 12936_2018_2499_MOESM1_ESM.pdf [file 12936_2018_2499_MOESM1_ESM.pdf]

**Additional file 1.** Elevation and geographical location of each sampling point.

| <b>Sampling point ID</b> | <b>Location °N</b> | <b>Location °E</b> | <b>Altitude (m)</b> |
|--------------------------|--------------------|--------------------|---------------------|
| HH1-1                    | 5.886              | 37.49152778        | 1117                |
| HH1-2                    | 5.886194444        | 37.49152778        | 1120                |
| HH1-3                    | 5.886416667        | 37.49155556        | 1119                |
| HH1-4                    | 5.886638889        | 37.49155556        | 1118                |
| HH1-5                    | 5.886833333        | 37.49158333        | 1116                |
| HH1-6                    | 5.885916667        | 37.49144444        | 1116                |
| HH1-7                    | 5.885944444        | 37.49125           | 1116                |
| HH1-8                    | 5.885972222        | 37.49130556        | 1112                |
| HH1-9                    | 5.885972222        | 37.49080556        | 1115                |
| HH1-10                   | 5.886027778        | 37.49058333        | 1119                |
| HH1-11                   | 5.885833333        | 37.4915            | 1117                |
| HH1-12                   | 5.885611111        | 37.49147222        | 1118                |
| HH1-13                   | 5.885333333        | 37.4915            | 1117                |
| HH1-14                   | 5.885138889        | 37.49161111        | 1117                |
| HH1-15                   | 5.884833333        | 37.49163889        | 1115                |
| HH1-16                   | 5.885916667        | 37.49161111        | 1118                |
| HH1-17                   | 5.885916667        | 37.49188889        | 1117                |
| HH1-18                   | 5.885916667        | 37.49205556        | 1117                |
| HH1-19                   | 5.885861111        | 37.49227778        | 1117                |
| HH1-20                   | 5.885777778        | 37.49255556        | 1117                |
| HH2-1                    | 5.883027778        | 37.489             | 1116                |
| HH2-2                    | 5.883138889        | 37.48886111        | 1117                |
| HH2-3                    | 5.883277778        | 37.48866667        | 1119                |
| HH2-4                    | 5.883388889        | 37.48844444        | 1117                |
| HH2-5                    | 5.8835             | 37.48825           | 1118                |
| HH2-6                    | 5.883083333        | 37.48908333        | 1119                |
| HH2-7                    | 5.88325            | 37.48916667        | 1119                |
| HH2-8                    | 5.883444444        | 37.48925           | 1119                |
| HH2-9                    | 5.883666667        | 37.48936111        | 1118                |
| HH2-10                   | 5.883861111        | 37.48944444        | 1119                |
| HH2-11                   | 5.882972222        | 37.48911111        | 1118                |
| HH2-12                   | 5.882833333        | 37.48930556        | 1118                |
| HH2-13                   | 5.882694444        | 37.4895            | 1116                |
| HH2-14                   | 5.882583333        | 37.48969444        | 1115                |
| HH2-15                   | 5.882444444        | 37.48988889        | 1116                |
| HH2-16                   | 5.882944444        | 37.48902778        | 1117                |
| HH2-17                   | 5.882777778        | 37.48891667        | 1117                |
| HH2-18                   | 5.882583333        | 37.48883333        | 1115                |

| <b>Sampling point ID</b> | <b>Location °N</b> | <b>Location °E</b> | <b>Altitude (m)</b> |
|--------------------------|--------------------|--------------------|---------------------|
| HH2-19                   | 5.882388889        | 37.48872222        | 1115                |
| HH2-20                   | 5.882194444        | 37.48858333        | 1117                |
| HH4-1                    | 5.8835             | 37.48538889        | 1120                |
| HH4-2                    | 5.883666667        | 37.4855            | 1119                |
| HH4-3                    | 5.883833333        | 37.48563889        | 1122                |
| HH4-4                    | 5.883972222        | 37.48580556        | 1122                |
| HH4-5                    | 5.884111111        | 37.486             | 1122                |
| HH4-6                    | 5.883472222        | 37.48525           | 1119                |
| HH4-7                    | 5.883527778        | 37.48505556        | 1121                |
| HH4-8                    | 5.883555556        | 37.48486111        | 1121                |
| HH4-9                    | 5.883638889        | 37.48466667        | 1121                |
| HH4-10                   | 5.88375            | 37.48447222        | 1122                |
| HH4-11                   | 5.883388889        | 37.48530556        | 1119                |
| HH4-12                   | 5.883305556        | 37.48525           | 1121                |
| HH4-13                   | 5.883027778        | 37.48519444        | 1122                |
| HH4-14                   | 5.882861111        | 37.48511111        | 1120                |
| HH4-15                   | 5.882722222        | 37.485             | 1119                |
| HH4-16                   | 5.883416667        | 37.48538889        | 1121                |
| HH4-17                   | 5.883305556        | 37.48555556        | 1119                |
| HH4-18                   | 5.883194444        | 37.48569444        | 1119                |
| HH4-19                   | 5.883083333        | 37.48583333        | 1117                |
| HH4-20                   | 5.883027778        | 37.486             | 1117                |
| HH7-1                    | 5.885222222        | 37.48608333        | 1127                |
| HH7-2                    | 5.885361111        | 37.48616667        | 1127                |
| HH7-3                    | 5.885555556        | 37.48627778        | 1127                |
| HH7-4                    | 5.885777778        | 37.48636111        | 1123                |
| HH7-5                    | 5.885972222        | 37.48644444        | 1121                |
| HH7-6                    | 5.885222222        | 37.486             | 1116                |
| HH7-7                    | 5.885277778        | 37.48583333        | 1118                |
| HH7-8                    | 5.885305556        | 37.48583333        | 1120                |
| HH7-9                    | 5.885361111        | 37.48536111        | 1119                |
| HH7-10                   | 5.885444444        | 37.48516667        | 1121                |
| HH7-11                   | 5.885111111        | 37.486             | 1119                |
| HH7-12                   | 5.884972222        | 37.48586111        | 1122                |
| HH7-13                   | 5.884777778        | 37.48575           | 1124                |
| HH7-14                   | 5.884583333        | 37.48566667        | 1126                |
| HH7-15                   | 5.884416667        | 37.48547222        | 1125                |
| HH7-16                   | 5.885111111        | 37.48608333        | 1114                |
| HH7-17                   | 5.885              | 37.48622222        | 1115                |
| HH7-18                   | 5.884888889        | 37.48641667        | 1116                |

| <b>Sampling point ID</b> | <b>Location °N</b> | <b>Location °E</b> | <b>Altitude (m)</b> |
|--------------------------|--------------------|--------------------|---------------------|
| HH7-19                   | 5.884777778        | 37.48663889        | 1117                |
| HH7-20                   | 5.884666667        | 37.48683333        | 1122                |
| HH8-1                    | 5.882333333        | 37.48383333        | 1119                |
| HH8-2                    | 5.8825             | 37.48391667        | 1122                |
| HH8-3                    | 5.882722222        | 37.48405556        | 1122                |
| HH8-4                    | 5.882916667        | 37.48416667        | 1122                |
| HH8-5                    | 5.874777778        | 37.48427778        | 1123                |
| HH8-6                    | 5.882305556        | 37.48375           | 1122                |
| HH8-7                    | 5.882416667        | 37.48358333        | 1121                |
| HH8-8                    | 5.882472222        | 37.48338889        | 1122                |
| HH8-9                    | 5.882583333        | 37.49983333        | 1120                |
| HH8-10                   | 5.882666667        | 37.49966667        | 1122                |
| HH8-11                   | 5.882222222        | 37.48377778        | 1122                |
| HH8-12                   | 5.882055556        | 37.48369444        | 1121                |
| HH8-13                   | 5.881916667        | 37.48363889        | 1122                |
| HH8-14                   | 5.881694444        | 37.48355556        | 1121                |
| HH8-15                   | 5.881472222        | 37.48344444        | 1122                |
| HH8-16                   | 5.88225            | 37.48386111        | 1118                |
| HH8-17                   | 5.882166667        | 37.48402778        | 1119                |
| HH8-18                   | 5.882027778        | 37.48419444        | 1117                |
| HH8-19                   | 5.881916667        | 37.48438889        | 1116                |
| HH8-20                   | 5.881805556        | 37.48458333        | 1116                |
| HH3-1                    | 5.89228            | 37.48524           | 1121                |
| HH3-2                    | 5.89217            | 37.48511           | 1121                |
| HH3-3                    | 5.89203            | 37.48492           | 1119                |
| HH3-4                    | 5.89188            | 37.48474           | 1120                |
| HH3-5                    | 5.89174            | 37.48454           | 1120                |
| HH3-6                    | 5.89222            | 37.48532           | 1120                |
| HH3-7                    | 5.89202            | 37.48539           | 1120                |
| HH3-8                    | 5.89182            | 37.48553           | 1120                |
| HH3-9                    | 5.89162            | 37.4856            | 1119                |
| HH3-10                   | 5.89142            | 37.48567           | 1118                |
| HH3-11                   | 5.89239            | 37.48542           | 1122                |
| HH3-12                   | 5.89239            | 37.48561           | 1121                |
| HH3-13                   | 5.89248            | 37.48584           | 1118                |
| HH3-14                   | 5.89256            | 37.48605           | 1121                |
| HH3-15                   | 5.89259            | 37.48628           | 1119                |
| HH3-16                   | 5.89243            | 37.48532           | 1121                |
| HH3-17                   | 5.89259            | 37.48523           | 1119                |
| HH3-18                   | 5.89279            | 37.48515           | 1120                |

| <b>Sampling point ID</b> | <b>Location °N</b> | <b>Location °E</b> | <b>Altitude (m)</b> |
|--------------------------|--------------------|--------------------|---------------------|
| HH3-19                   | 5.89299            | 37.48508           | 1120                |
| HH3-20                   | 5.89320            | 37.48503           | 1123                |
| HH5-1                    | 5.89721            | 37.48631           | 1117                |
| HH5-2                    | 5.89702            | 37.48633           | 1117                |
| HH5-3                    | 5.89683            | 37.48637           | 1119                |
| HH5-4                    | 5.89661            | 37.48637           | 1116                |
| HH5-5                    | 5.89639            | 37.48641           | 1115                |
| HH5-6                    | 5.89730            | 37.48631           | 1117                |
| HH5-7                    | 5.89744            | 37.48614           | 1114                |
| HH5-8                    | 5.89759            | 37.48597           | 1116                |
| HH5-9                    | 5.89780            | 37.48581           | 1115                |
| HH5-10                   | 5.89796            | 37.48569           | 1119                |
| HH5-11                   | 5.89724            | 37.48643           | 1116                |
| HH5-12                   | 5.89717            | 37.48653           | 1114                |
| HH5-13                   | 5.89701            | 37.48672           | 1117                |
| HH5-14                   | 5.89687            | 37.4869            | 1114                |
| HH5-15                   | 5.89675            | 37.48708           | 1115                |
| HH5-16                   | 5.89735            | 37.48637           | 1115                |
| HH5-17                   | 5.89750            | 37.48637           | 1119                |
| HH5-18                   | 5.89773            | 37.48631           | 1115                |
| HH5-19                   | 5.89793            | 37.48624           | 1116                |
| HH5-20                   | 5.89817            | 37.48625           | 1120                |
| HH6-1                    | 5.89979            | 37.48825           | 1120                |
| HH6-2                    | 5.89981            | 37.48846           | 1118                |
| HH6-3                    | 5.89983            | 37.48868           | 1118                |
| HH6-4                    | 5.89983            | 37.48893           | 1117                |
| HH6-5                    | 5.89984            | 37.48914           | 1117                |
| HH6-6                    | 5.89984            | 37.48818           | 1117                |
| HH6-7                    | 5.90000            | 37.48818           | 1117                |
| HH6-8                    | 5.90023            | 37.48819           | 1117                |
| HH6-9                    | 5.90046            | 37.48821           | 1118                |
| HH6-10                   | 5.90069            | 37.48826           | 1116                |
| HH6-11                   | 5.89979            | 37.48812           | 1119                |
| HH6-12                   | 5.89980            | 37.48792           | 1119                |
| HH6-13                   | 5.89981            | 37.48772           | 1119                |
| HH6-14                   | 5.89990            | 37.48751           | 1118                |
| HH6-15                   | 5.89994            | 37.48727           | 1117                |
| HH6-16                   | 5.89972            | 37.48816           | 1117                |
| HH6-17                   | 5.89955            | 37.48813           | 1121                |
| HH6-18                   | 5.89933            | 37.48817           | 1117                |

| <b>Sampling point ID</b> | <b>Location °N</b> | <b>Location °E</b> | <b>Altitude (m)</b> |
|--------------------------|--------------------|--------------------|---------------------|
| HH6-19                   | 5.8991             | 37.48812           | 1120                |
| HH6-20                   | 5.89889            | 37.48808           | 1120                |
| HH9-1                    | 5.89586            | 37.49122           | 1112                |
| HH9-2                    | 5.89604            | 37.49122           | 1115                |
| HH9-3                    | 5.89624            | 37.49123           | 1116                |
| HH9-4                    | 5.89647            | 37.49125           | 1114                |
| HH9-5                    | 5.89668            | 37.49129           | 1113                |
| HH9-6                    | 5.89582            | 37.49119           | 1113                |
| HH9-7                    | 5.89587            | 37.491             | 1114                |
| HH9-8                    | 5.89592            | 37.49077           | 1114                |
| HH9-9                    | 5.89599            | 37.49055           | 1114                |
| HH9-10                   | 5.89606            | 37.49037           | 1115                |
| HH9-11                   | 5.89573            | 37.49124           | 1115                |
| HH9-12                   | 5.89554            | 37.49125           | 1114                |
| HH9-13                   | 5.89531            | 37.49125           | 1114                |
| HH9-14                   | 5.89509            | 37.49129           | 1116                |
| HH9-15                   | 5.89489            | 37.49135           | 1114                |
| HH9-16                   | 5.8958             | 37.49131           | 1117                |
| HH9-17                   | 5.89578            | 37.49147           | 1115                |
| HH9-18                   | 5.89572            | 37.49171           | 1117                |
| HH9-19                   | 5.89568            | 37.49195           | 1115                |
| HH9-20                   | 5.89566            | 37.49216           | 1116                |
| HH10-1                   | 5.90134            | 37.4853            | 1122                |
| HH10-2                   | 5.90147            | 37.4844            | 1120                |
| HH10-3                   | 5.90168            | 37.48554           | 1121                |
| HH10-4                   | 5.90188            | 37.48563           | 1117                |
| HH10-5                   | 5.9021             | 37.48569           | 1119                |
| HH10-6                   | 5.90128            | 37.48518           | 1119                |
| HH10-7                   | 5.90124            | 37.48501           | 1119                |
| HH10-8                   | 5.9012             | 37.48478           | 1117                |
| HH10-9                   | 5.90115            | 37.48456           | 1117                |
| HH10-10                  | 5.90103            | 37.48439           | 1116                |
| HH10-11                  | 5.90125            | 37.4853            | 1117                |
| HH10-12                  | 5.90106            | 37.48537           | 1117                |
| HH10-13                  | 5.90087            | 37.48553           | 1119                |
| HH10-14                  | 5.90069            | 37.48565           | 1118                |
| HH10-15                  | 5.90059            | 37.48574           | 1121                |
| HH10-16                  | 5.90138            | 37.48524           | 1116                |
| HH10-17                  | 5.90153            | 37.48514           | 1117                |
| HH10-18                  | 5.90166            | 37.48505           | 1115                |

| <b>Sampling point ID</b> | <b>Location °N</b> | <b>Location °E</b> | <b>Altitude (m)</b> |
|--------------------------|--------------------|--------------------|---------------------|
| HH10-19                  | 5.90181            | 37.48483           | 1115                |
| HH10-20                  | 5.90197            | 37.48467           | 1117                |
