# Supplementary material for: Shady business: understanding the spatial ecology of exophilic Anopheles mosquitoes
Source: PubMed Central journal article supplement (PMC6173902; doi:10.1186/s12936-018-2499-7), 2018-10-05
Supplement: 12936_2018_2499_MOESM3_ESM.pdf [file 12936_2018_2499_MOESM3_ESM.pdf]

**Additional file 3.** Results obtained from binary logistic regression on the association between the presence or absence of *Anopheles* mosquitoes and landscape characteristics within 10 m radius of the sampling points.

| <b>Variables</b>                 | <b>Estimate</b> | <b>Std.<br/>Error</b> | <b>z value</b> | <b>Pr(&gt; z )</b> |
|----------------------------------|-----------------|-----------------------|----------------|--------------------|
| (Intercept)                      | -2.6140         | 1.139                 | -2.295         | 0.0217 *           |
| Distance to nearest dwelling (m) | 0.0003          | 0.006                 | 0.068          | 0.9456             |
| Breeding sites (present)         | -0.0732         | 2.034                 | -0.036         | 0.9713             |
| Number of breeding sites         | 0.4235          | 1.907                 | 0.222          | 0.8242             |
| Percent canopy cover             | 0.0321          | 0.008                 | 4.154          | 0.0000 ***         |
| Land cover (banana)              | 1.0090          | 1.185                 | 0.851          | 0.3945             |
| Land cover (bare)                | 0.7281          | 1.295                 | 0.562          | 0.5740             |
| Land cover (grass)               | 1.2520          | 1.562                 | 0.802          | 0.4226             |
| Land cover (maize)               | 0.2452          | 1.195                 | 0.205          | 0.8375             |
| Land cover (mixed)               | 0.4082          | 1.165                 | 0.350          | 0.7260             |
| Land cover (ploughed)            | 0.4134          | 1.342                 | 0.308          | 0.7580             |
| Percent ground vegetation        | -0.0136         | 0.014                 | -0.970         | 0.3318             |
