# Supplementary material for: Shady business: understanding the spatial ecology of exophilic Anopheles mosquitoes
Source: Malar J. 2018 Oct 5;17:351. doi: 10.1186/s12936-018-2499-7 (PMC6173902; doi:10.1186/s12936-018-2499-7)
Supplement: Supplementary file 2 — Additional file 2. Results obtained from zero-inflated negative binomial regression on the association between the number of Anopheles mosquitoes caught and landscape characteristics within a 10 m radius of the sampling points. [file 12936_2018_2499_MOESM2_ESM.pdf]

**Additional file 2.** Results obtained from zero-inflated negative binomial regression on the association between the number of *Anopheles* mosquitoes caught and landscape characteristics within 10 m radius of the sampling points.

| Variables                                | Females  |           | Males    |          |
|------------------------------------------|----------|-----------|----------|----------|
|                                          | Estimate | Pr(> z )  | Estimate | Pr(> z ) |
| <b>Count model coefficients</b>          |          |           |          |          |
| <b>(negbin with log link)</b>            |          |           |          |          |
| (Intercept)                              | -1.3478  | 0.0326*   | -1.3673  | 0.2419   |
| Distance to nearest dwelling (m)         | 0.0132   | 0.0086**  | 0.0053   | 0.4724   |
| Breeding sites (present)                 | -0.2112  | 0.8520    | -1.3583  | 0.5030   |
| Number of breeding sites                 | 0.4284   | 0.6704    | 0.6199   | 0.6883   |
| Percent canopy cover                     | 0.0232   | 0.0004*** | 0.0199   | 0.2034   |
| Percent ground vegetation                | 0.0110   | 0.2401    | -0.0379  | 0.0814   |
| <b>Zero-inflation model coefficients</b> |          |           |          |          |
| <b>(binomial with logit link)</b>        |          |           |          |          |
| (Intercept)                              | 1.5594   | 0.0685    | 2.1742   | 0.144    |
| Distance to nearest dwelling (m)         | -0.0030  | 0.7128    | 0.0171   | 0.326    |
| Breeding sites (present)                 | -0.7048  | 0.7523    | 3.1967   | 0.549    |
| Number of breeding sites                 | 0.0956   | 0.9616    | -3.3128  | 0.487    |
| Percent canopy cover                     | -0.0283  | 0.0014**  | -0.0444  | 0.098    |
| Percent ground vegetation                | 0.0096   | 0.4803    | 0.0021   | 0.960    |

\*p < 0.05, \*\*p < 0.01, \*\*\*p < 0.001
